# Supplementary material for: Structural and Functional Evaluation of C. elegans Filamins FLN-1 and FLN-2
Source: PLoS One. 2011 Jul 25;6(7):e22428. doi: 10.1371/journal.pone.0022428 (PMC3143143; doi:10.1371/journal.pone.0022428)
Supplement: Table S1 — Sequencing primers. Primers used for amplification of FLN-1 and FLN-2 transcripts for sequence. Vector-specific primers T7 and SP6 were also used for sequencing. (XLS) [file pone.0022428.s004.xls]

## Sheet: Sheet1
	Table S1A: fln-1 Sequencing Primers
	Forward Primer		Reverse Primer
	ID	Sequence	ID	Sequence
	IK25	CTCCCACAAGAATGTTGGAAA	IK26	TCCATCACGAGAAAGCTTCA
	IK19	GTAAAGCTTATGGACCTGGATTGGA	IK37	AGAAGCTTGTCGCCTTCGATGGACCC
	IK25	CTCCCACAAGAATGTTGGAAA	IK20	TAGCTAGCCTTGGCACGAATCTCAC
	SL1	GGTTTAATTACCCAAGTTTGAG	IK37	AGAAGCTTGTCGCCTTCGATGGACCC
	SL1	GGTTTAATTACCCAAGTTTGAG	IK20	TAGCTAGCCTTGGCACGAATCTCAC
	IK50	TCTCGACAACGACTTTGGCG	IK49	AGCCGGACCAGGAGCTGTAGA
	IK27	CAAGCACACCGAATCCAAATCC	IK20	TAGCTAGCCTTGGCACGAATCTCAC
	IK50	AGCTAGCACAATGCGATCAGCAACT	IK24	AGCCGGACCAGGAGCTGTAGA
	IK27	CAAGCACACCGAATCCAAATCC	IK44	CCTTCATGTGATGCATTGGT
	Table S1B: fln-2 Sequencing Primers
	Forward Primer		Reverse Primer
	ID	Sequence	ID	Sequence
	IK30	CATTGCCGATGCTTCGTCTG	IK12	ATGGTACCATTGCCAAGGCTTATCTGCT
	SL1	GGTTTAATTACCCAAGTTTGAG	IK10	AGAAGCTTCCTTGTGGTTCAGCAATATC
	SL1	GGTTTAATTACCCAAGTTTGAG	IK12	ATGGTACCATTGCCAAGGCTTATCTGCT
	SL1	GGTTTAATTACCCAAGTTTGAG	IK57	CTGCAGATGTCTTTTGCCTCTGCT
	IK9	AGCTAGCCTTACAAACTTCCGAACCAA	IK62	CGAAACGAGACCAACATCGG
	IK9	AGCTAGCCTTACAAACTTCCGAACCAA	IK10	AGAAGCTTCCTTGTGGTTCAGCAATATC
	IK55	GCTAGCACTCAGGAAGAAACACGCA	IK57	CTGCAGATGTCTTTTGCCTCTGCT
	IK82	ACTCCAGCCACCACACCGAA	IK83	CACGCTTTGGCTCTGACACC
	IK55	GCTAGCACTCAGGAAGAAACACGCA	IK12	ATGGTACCATTGCCAAGGCTTATCTGCT
	CD20	ATAAGCCTTGGCAATCGT	CD21	CTTTTTCTCCTTTTTCAG
	CD22	AGAGCCAAAGCGTGAAAT	CD23	TGCGTCCTTTATGTTTGG
	CD36	GTTTACGAGCGATATGAC	CD35	ACTTGGCTGATAACTTCGG
	CD37	GAGAAAGAAGAACGCGCCA	CD40	TCTCTAATTTCTGGCGTCT
	CD39	GTGGCGAACTTGATGTGATG	CD38	ATCCATGTCTAGGTCGTTA
	CD68	GTGCTGGAAACATGGAGAT	CD69	CCATTTGGTCTACGCATTAC
